# Supplementary material for: Revealing the local crystallinity of single silicon core–shell nanowires using tip-enhanced Raman spectroscopy
Source: publisher site journal article supplement (doi:10.3762/bjnano.11.99), 2020-07-31
Supplement: Additional file 1 [file 2190-4286-11-99-S1.pdf]

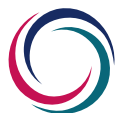

## Supporting Information

for

### **Revealing the local crystallinity of single silicon core–shell nanowires using tip-enhanced Raman spectroscopy**

Marius van den Berg, Ardeshir Moeinian, Arne Kobald, Yu-Ting Chen, Anke Horneber, Steffen Strehle, Alfred J. Meixner and Dai Zhang

*Beilstein J. Nanotechnol.* **2020**, *11*, 1147–1156. [doi:10.3762/bjnano.11.99](https://doi.org/10.3762/bjnano.11.99)

## Additional experimental data

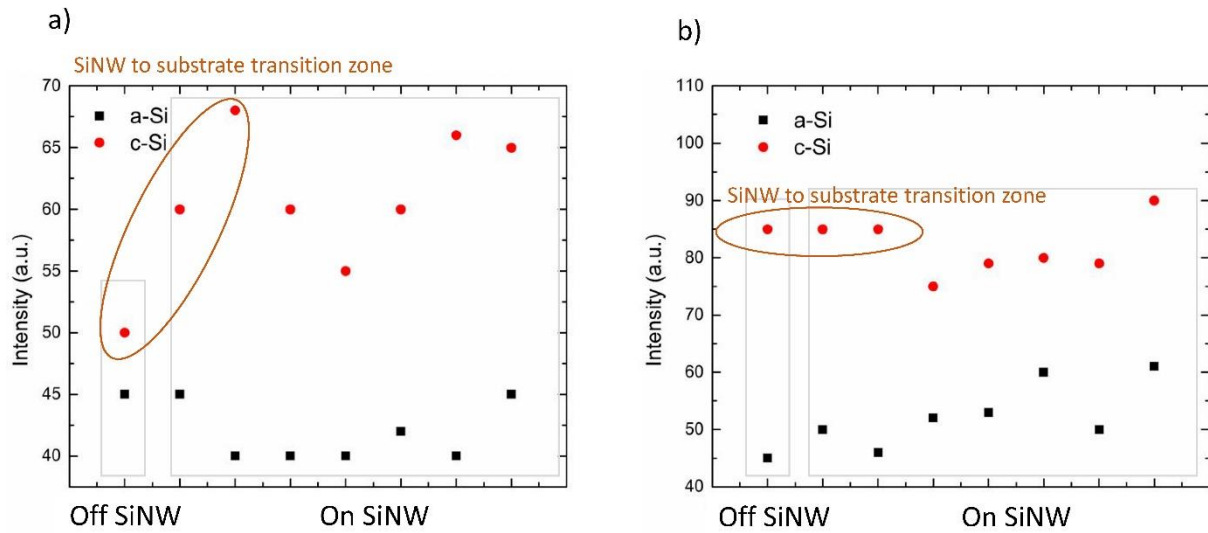

**Figure S1:** a) and b) are the intensity evolutions of the a-Si and c-Si Raman peaks shown in Figure 5c and Figure 5d, respectively. In the TERS measurements shown in Figure S1a, the a-Si Raman peak intensity stays nearly constant indicating the crystal state of the SiNW shell; while the c-Si intensity varies across the perimeter of the SiNW. In the confocal measurements shown in Figure S1b, the variations in the c-Si intensity, for example at the transition zone, are smaller than those from the TERS measurements due to the limited optical resolution.

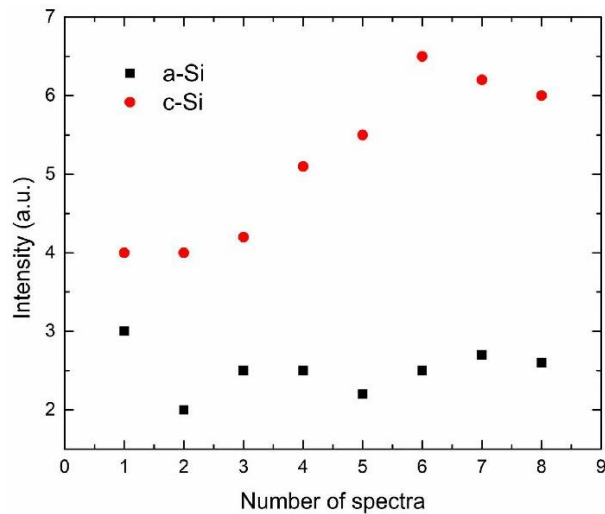

**Figure S2:** The intensity evolution of the a-Si and c-Si Raman peaks shown in Figure 6b. The 8th data points are derived from the red spectrum in Figure 6b; while the 1st data points are derived from the light blue spectrum. Here, the variation in the local crystallinity can be seen from the evolution in the c-Si Raman intensity.
